# Supplementary material
Source: HighWire-hosted journal article supplement (https://gh.bmj.com/content/9/2/e014044)
Supplement: inline-supplementary-material-6 [file inline-supplementary-material-6.pdf]

**Supplementary table 2. Mortality by cause of death**

|                                 | MR per 1000 PYRS | HR (95% CI)        |
|---------------------------------|------------------|--------------------|
|                                 | (deaths/PYRS)    |                    |
| <b>Malaria</b>                  |                  |                    |
| Intervention                    | 0.0 (0/105)      | N/A                |
| Control                         | 9.9 (1/101)      | Reference          |
| <b>Respiratory infection</b>    |                  |                    |
| Intervention                    | 9.5 (1/105)      | 0.53 (0.06 - 5.04) |
| Control                         | 29.6 (3/101)     | Reference          |
| <b>Sepsis</b>                   |                  |                    |
| Intervention                    | 28.5 (3/105)     | 0.51 (0.16 - 1.65) |
| Control                         | 98.7 (10/101)    | Reference          |
| <b>Gastrointestinal disease</b> |                  |                    |
| Intervention                    | 0.0 (0/105)      | N/A                |
| Control                         | 9.9 (1/101)      | Reference          |
| <b>Other</b>                    |                  |                    |
| Intervention                    | 28.5 (3/105)     | 0.37 (0.11 - 1.23) |
| Control                         | 128.4 (13/101)   | Reference          |
