# Supplementary material
Source: HighWire-hosted journal article supplement (https://gh.bmj.com/content/9/2/e014044)
Supplement: inline-supplementary-material-9 [file inline-supplementary-material-9.pdf]

**Supplementary table 5. Effect of BCG and OPV vaccines provided at a home visit on non-accidental mortality until day 60 of life without censoring at next vaccination/mobile team visit**

|              | n    | MR per 1000 PYRS<br>(deaths/PYRS) | HR (95% CI)        |
|--------------|------|-----------------------------------|--------------------|
| Intervention | 1007 | 50.2 (8/159)                      | 0.45 (0.21 - 0.98) |
| Control      | 1218 | 158.1 (30/190)                    | Reference          |
| <b>Rural</b> |      |                                   |                    |
| Intervention | 684  | 64.6 (7/108)                      | 0.41 (0.18 - 0.93) |
| Control      | 988  | 195.6 (30/153)                    | Reference          |
| <b>Urban</b> |      |                                   |                    |
| Intervention | 323  | 19.6 (1/51)                       | NA                 |
| Control      | 230  | 0.0 (0/36)                        | Reference          |

MR: Mortality rate, PYRS: Person years, HR: Hazard ratio, CI: Confidence interval, NA: Not applicable
